# Supplementary material for: The effect of H2 occupancy modes in small and large cages of H2–tetrahydrofuran hydrates on the hydrates’ stability and H2 storage capacity
Source: Royal Society of Chemistry journal article supplement (doi:10.1039/d4cp04820b), 2025-01-01
Supplement: d4cp04820b1.pdf [file d4cp04820b1.pdf]

## Supplementary Information

for

*The Effect of  $H_2$  Occupancy Modes in Small and Large Cages of s*

*$H_2$ -Tetrahydrofuran Hydrates on the Hydrates Stability and*

*$H_2$  Storage Capacity*

Ruyi Zheng <sup>1,2</sup>, Sohaib Mohammed <sup>1</sup>, Yang Jia <sup>1</sup>, Rituparna Hazra <sup>1</sup> and Greeshma Gadikota<sup>1,\*</sup>

<sup>1</sup> School of Civil and Environmental Engineering, Cornell University, Ithaca, NY 14853

<sup>2</sup> Frontier Institute of Science and Technology, Xi'an Jiaotong University, Xi'an, Shaanxi  
710054, China

\*Corresponding author: Greeshma Gadikota, email: [gg464@cornell.edu](mailto:gg464@cornell.edu)

**Table S1.** H<sub>2</sub> storage capacity in H<sub>2</sub> and H<sub>2</sub>-THF hydrates

| Hydrates            | Storage capacity, wt% | P/MPa; T/K       | Note (occupancy in small and large cages)                                                                                                                                                                                                                                    | Reference |
|---------------------|-----------------------|------------------|------------------------------------------------------------------------------------------------------------------------------------------------------------------------------------------------------------------------------------------------------------------------------|-----------|
| H <sub>2</sub>      | 1-4                   | 30-600; 150-300  | Occupancy in small cages is around 1, it ranges from 1-4 in large cages, storage capacity increases with pressure; used MC simulation                                                                                                                                        | (1)       |
| H <sub>2</sub>      | 1-6                   | 150; 200-285     | MD simulation of H <sub>2</sub> between slabs, saturated with H <sub>2</sub> gas; One H <sub>2</sub> occupancy in small cages, up to six H <sub>2</sub> in large cages                                                                                                       | (2)       |
| H <sub>2</sub>      | 1-4                   | 100-500; 170-273 | MC simulation, one H <sub>2</sub> in small and up to four occupying large cages, dependent on pressure                                                                                                                                                                       | (3)       |
| H <sub>2</sub>      | 2.6-3.3               | -; 80-240        | Based on MD simulation, most stable sII H <sub>2</sub> hydrates contain 2-3 H <sub>2</sub> in large cages and one H <sub>2</sub> molecule in small ones                                                                                                                      | (4)       |
| D <sub>2</sub>      | 4-5                   | 0.1-200; 40-200  | Neutron diffraction, single H <sub>2</sub> occupancy in small cages, double to quadruple occupancy in large ones                                                                                                                                                             | (5)       |
| H <sub>2</sub>      | 1-5                   | 15; 243          | Experiments using PXRD and Raman, double H <sub>2</sub> in small and quadruple H <sub>2</sub> in large cages detected, but not uniform; H <sub>2</sub> hydrates formed by exchanging with N <sub>2</sub> hydrates                                                            | (6)       |
| H <sub>2</sub>      | 5.6                   | -                | Ab initio simulation, the highest stability of H <sub>2</sub> is achieved by accommodating 2 and 5 H <sub>2</sub> in the small and large cages respectively                                                                                                                  | (7)       |
| H <sub>2</sub>      | 5.3                   | 200-300; 249     | Attributed two H <sub>2</sub> molecules in small cages and four H <sub>2</sub> in large cages using Raman                                                                                                                                                                    | (8)       |
| H <sub>2</sub>      | 1-4                   | 1-500; 200-300   | MC simulation with fixed cage configuration; up to 1 H <sub>2</sub> in small, up to 4 H <sub>2</sub> in large cages;                                                                                                                                                         | (9)       |
| H <sub>2</sub>      | 5                     | 200; 250         | Thermodynamic model and ab initio simulation: the occupancy of H <sub>2</sub> in the small and large cages is 2 and 3.96                                                                                                                                                     | (10)      |
| H <sub>2</sub>      | 5-6                   | -                | Highest stabilization energy of 5 <sup>12</sup> , 5 <sup>12</sup> 6 <sup>2</sup> and 5 <sup>12</sup> 6 <sup>4</sup> cages was obtained with H <sub>2</sub> occupancy of 2, 3, and 5 using DFT and ab initio calculation;                                                     | (11)      |
| H <sub>2</sub>      | 6.8                   | -; 250           | Evaluated the storage capacity of small and large cages in a periodic unit cell of sI H <sub>2</sub> hydrates using first principle calculation; the lowest binding energy obtained by small and large cages occupied by two and four H <sub>2</sub> molecules, respectively | (12)      |
| H <sub>2</sub> -THF | 1                     | 5; 279.6         | All large cages were occupied by THF; No evident of two H <sub>2</sub> occupying the small cages by NMR; Volumetric measurement suggested single occupancy of H <sub>2</sub> in small cages                                                                                  | (13)      |
| H <sub>2</sub> -THF | 1.0                   | 11.3; 280.8      | Single occupancy of H <sub>2</sub> in small cages; all large cages were occupied by THF, with stoichiometric concentration of THF                                                                                                                                            | (14)      |
| H <sub>2</sub> -THF | 1                     | 12.5-70, 20-270  | Neutron diffraction, single occupancy of H <sub>2</sub> in small cages when THF occupied all large cages                                                                                                                                                                     | (15)      |

|                                      |         |                    |                                                                                                                                                                                                                                                  |         |
|--------------------------------------|---------|--------------------|--------------------------------------------------------------------------------------------------------------------------------------------------------------------------------------------------------------------------------------------------|---------|
| H <sub>2</sub> -THF                  | 1-2     | 10-100;<br>100-250 | MD simulation; single occupancy of H <sub>2</sub> in small cages; 2-3 H <sub>2</sub> occupying large cages when THF concentration is reduced, dependent on pressure                                                                              | (16)    |
| H <sub>2</sub> -THF                  | -       | -                  | H <sub>2</sub> is able to co-occupy the large cages with THF using DFT method                                                                                                                                                                    | (17)    |
| H <sub>2</sub> , H <sub>2</sub> -THF | 4.0     | 12; 270            | Occupancy of two H <sub>2</sub> in small cages; Interpreted H <sub>2</sub> occupancy using NMR; concluded the H <sub>2</sub> occupied large cages by reducing the THF concentration                                                              | (18)    |
| H <sub>2</sub> , H <sub>2</sub> -THF | 1.6-4.4 | -; 140             | Ab initio simulation; in pure H <sub>2</sub> hydrates, small cages may accommodate 1-2 H <sub>2</sub> and large cage may store 3-4; For H <sub>2</sub> -THF hydrates, one H <sub>2</sub> in small cage, one THF+H <sub>2</sub> in large cage     | (19)    |
| H <sub>2</sub> -THF                  | 2.24    | 15-70;<br>243      | Experimental exchanged N <sub>2</sub> -THF hydrates with H <sub>2</sub> , with P increased, occupancy of H <sub>2</sub> in small cage increased from 1 to 2; that in large cages ranges from 2 to 4; THF concentration 1 mol%                    | (20)    |
| H <sub>2</sub> -THF                  | 1       | 74.3; 265          | In-situ Raman; Detected H <sub>2</sub> occupying the large cages free from THF                                                                                                                                                                   | (21)    |
| H <sub>2</sub> -THF                  | 1.0     | 10-60;<br>270      | NMR; Single occupancy of H <sub>2</sub> in small cages; large cages were occupied by THF, independent of THF concentration                                                                                                                       | (22)    |
| H <sub>2</sub> -THF                  | 3.4     | 70;<br>255         | Used powdered ice to prepare hydrates, storage capacity increased with reducing THF concentration from 1.0 to 3.4 wt%; Based on Raman spectra and XRD, multiple occupancy in large cages, single occupancy in small cages                        | (23,24) |
| H <sub>2</sub> , H <sub>2</sub> -THF | 1-2     | -                  | For pure H <sub>2</sub> hydrates, single occupancy in the small cage is more favorable, but with structure optimization, double occupancy is more favorable; for H <sub>2</sub> -THF hydrates, no much difference for single or double occupancy | (25)    |

**Table S2.** Parameters of potential functions in the MD simulation

| Molecules        | Atom               | Mass, g/mol | Charges, eV | $E$ , kcal/mol | $\sigma$ , Å | $l$ , Å <sup>a</sup>                         |
|------------------|--------------------|-------------|-------------|----------------|--------------|----------------------------------------------|
| H <sub>2</sub> O | H                  | 1.008       | 0.5897      | 0              | 0            |                                              |
|                  | O                  | 15.9994     | -           | 0.21084        | 3.1668       | O-H: 0.9572                                  |
|                  | M                  | -           | -1.1794     | -              | -            | O-M: 0.1577                                  |
| H <sub>2</sub>   | H                  | 1.00794     | 0.4932      | 0              | 0            |                                              |
|                  | M <sub>H</sub>     | -           | -0.9864     | 0.06816        | 3.0380       | H-H: 0.7414                                  |
| THF              | C <sub>f1</sub>    | 12.011      | 0.024154    | 0.1094         | 3.816        | C <sub>f1</sub> -C <sub>f2</sub> : 1.5439    |
|                  | C <sub>f2</sub>    | 12.011      | 0.024169    | 0.1094         | 3.816        | C <sub>f2</sub> -C <sub>f3</sub> : 1.5309    |
|                  | C <sub>f3</sub>    | 12.011      | 0.171469    | 0.1094         | 3.816        | C <sub>f1</sub> -C <sub>f5</sub> : 1.5309    |
|                  | O <sub>f4</sub>    | 15.999      | -0.42513    | 0.17           | 3.367        | O <sub>f4</sub> -C <sub>f3</sub> : 1.4197    |
|                  | C <sub>f5</sub>    | 12.011      | 0.171478    | 0.1094         | 3.816        | O <sub>f4</sub> -C <sub>f5</sub> : 1.4197    |
|                  | H <sub>f1-6</sub>  | 1.008       | 0.005164    | 0.0157         | 2.974        | C <sub>f1</sub> -H <sub>f1-6</sub> : 1.0863  |
|                  | H <sub>f1-7</sub>  | 1.008       | -0.018458   | 0.0157         | 2.974        | C <sub>f1</sub> -H <sub>f1-7</sub> : 1.0869  |
|                  | H <sub>f2-8</sub>  | 1.008       | 0.005161    | 0.0157         | 2.974        | C <sub>f2</sub> -H <sub>f2-8</sub> : 1.0863  |
|                  | H <sub>f2-9</sub>  | 1.008       | -0.018462   | 0.0157         | 2.974        | C <sub>f2</sub> -H <sub>f2-9</sub> : 1.0869  |
|                  | H <sub>f3-10</sub> | 1.008       | 0.022566    | 0.0157         | 2.974        | C <sub>f3</sub> -H <sub>f3-10</sub> : 1.0858 |
|                  | H <sub>f3-11</sub> | 1.008       | 0.007663    | 0.0157         | 2.974        | C <sub>f3</sub> -H <sub>f3-11</sub> : 1.0954 |
|                  | H <sub>f5-12</sub> | 1.008       | 0.022564    | 0.0157         | 2.974        | C <sub>f5</sub> -H <sub>f5-12</sub> : 1.0858 |
|                  | H <sub>f5-13</sub> | 1.008       | 0.007661    | 0.0157         | 2.974        | C <sub>f5</sub> -H <sub>f5-13</sub> : 1.0954 |

<sup>a</sup> bond length

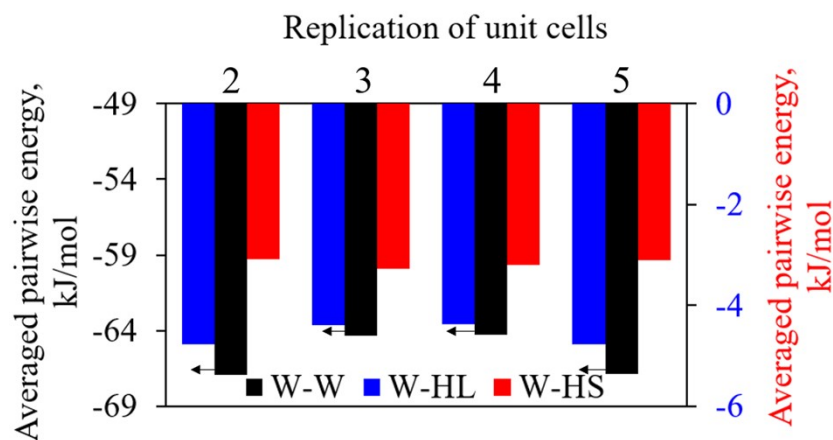

**Figure S1.** Pair-wise interaction energy between water (W),  $H_2$  in the large cages (HL) and  $H_2$  in the small cages (HS) with different replication of unit cells.

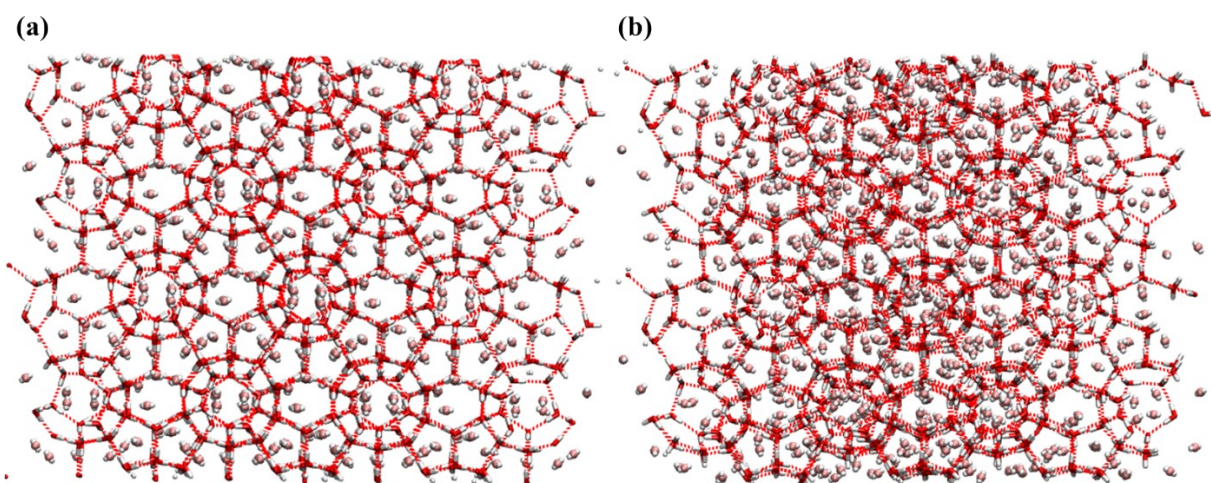

**Figure S2.** Simulation box of pure  $H_2$  hydrates with  $2 \times 2 \times 2$  sII unit cells at (a) initial simulation time and (b) the end of simulation.

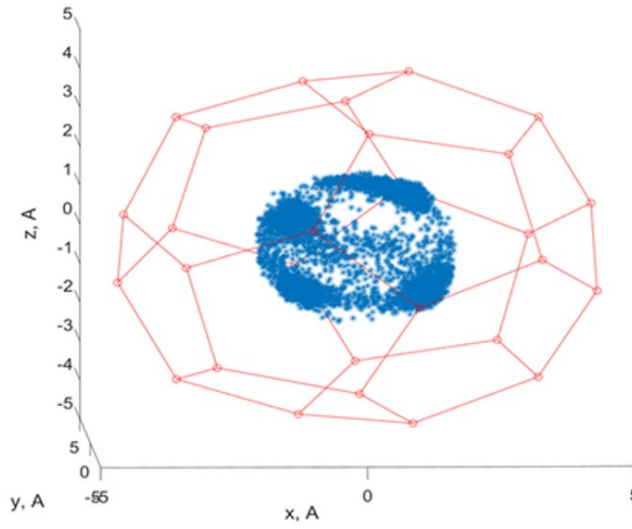

**Figure S3.** Distribution profile of the four H<sub>2</sub> molecules in one large cage (the origin of this coordinate represents the cage center).

The impact of H<sub>2</sub> occupancy in the small cages on the motion of THF molecules is analyzed by comparing the rotational autocorrelation function (RACF), i.e.,  $C(t)$ , as presented in Figure S3. It is found that the decay rate of THF orientation was fast, with an order of 10 ps. The RACF curves are fitted with the model described in Equation S1 to quantify the rotational relaxation time, with the parameters tabulated in **Table S3**. It is observed that the relaxation time of both oscillatory mode and rotational motion of THF increase when the small cages are occupied by 2 H<sub>2</sub> molecules.

$$C(t) = k \exp \frac{-t}{\tau_1} + (1 - k) \exp \frac{-t}{\tau_2} \quad (\text{S1})$$

where  $k$  is the pre-exponential constant;  $\tau_1$  and  $\tau_2$  are the relaxation time of oscillatory mode and rotational motion, ps.

Table S3. RACF parameters of THF with different occupancy modes in the small cages.

| Configuration | Parameters |               |               |
|---------------|------------|---------------|---------------|
|               | $k$        | $\tau_1$ , ps | $\tau_2$ , ps |
| HS1-THF8      | 0.43       | 0.86          | 2.48          |
| HS2-THF8      | 0.74       | 1.28          | 7.04          |

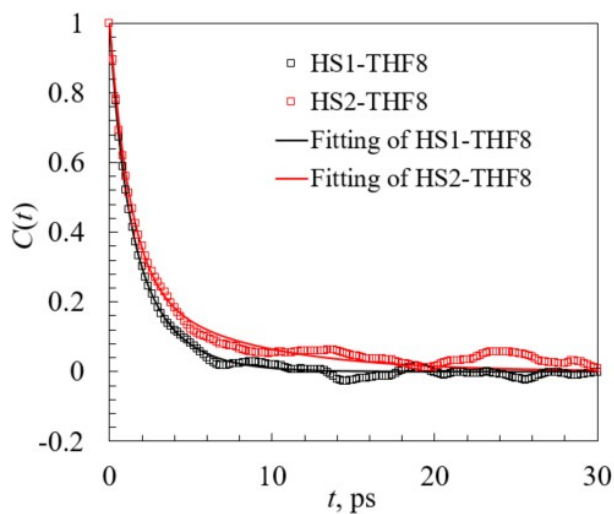

**Figure S4.** RACF curves of THF with different occupancy ratio of  $H_2$  in the small cages.

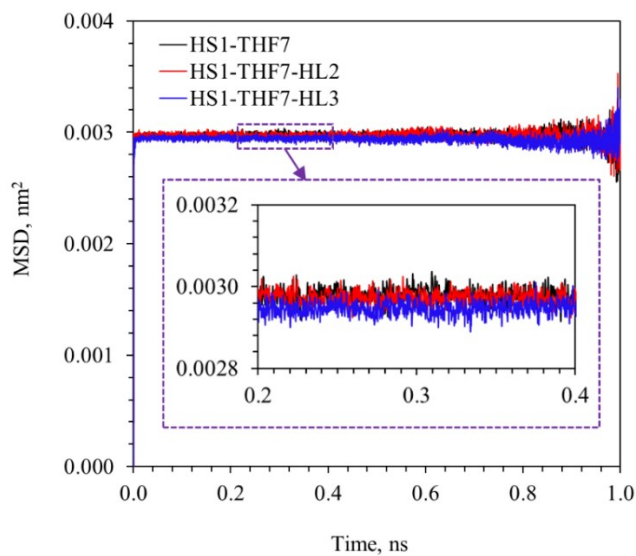

**Figure S5.** MSD of  $H_2O$  molecules with various occupancy modes of  $H_2$  in the THF-free large cages.

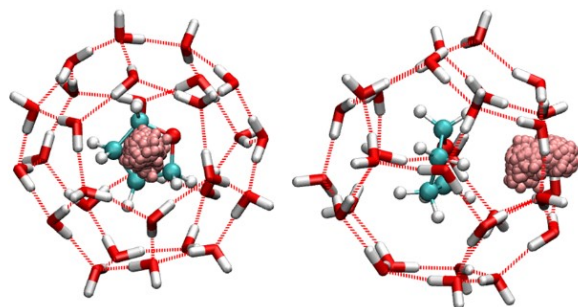

**Figure S6.** Distribution of one  $\text{H}_2$  molecules in Configuration *HSI-(THF+HL)8-140K* from two perspectives.

## Reference

1. Brumby PE, Yuhara D, Hasegawa T, Wu DT, Sum AK, Yasuoka K. Cage occupancies, lattice constants, and guest chemical potentials for structure II hydrogen clathrate hydrate from Gibbs ensemble Monte Carlo simulations. *The Journal of Chemical Physics*. 2019 Apr 7;150(13).
2. Frankcombe TJ, Kroes GJ. Molecular dynamics simulations of type-sII hydrogen clathrate hydrate close to equilibrium conditions. *The Journal of Physical Chemistry C*. 2007 Sep 6;111(35):13044-52.
3. Katsumasa K, Koga K, Tanaka H. On the thermodynamic stability of hydrogen clathrate hydrates. *The Journal of Chemical Physics*. 2007 Jul 28;127(4).
4. Krishnan Y, Ghaani MR, Desmedt A, English NJ. Hydrogen inter-cage hopping and cage occupancies inside hydrogen hydrate: Molecular-dynamics analysis. *Applied Sciences*. 2020 Dec 30;11(1):282.
5. Lokshin KA, Zhao Y, He D, Mao WL, Mao HK, Hemley RJ, Lobanov MV, Greenblatt M. Structure and dynamics of hydrogen molecules in the novel clathrate hydrate by high pressure neutron diffraction. *Physical Review Letters*. 2004 Sep 17;93(12):125503.

6. Lu H, Wang J, Liu C, Ratcliffe CI, Becker U, Kumar R, Ripmeester J. Multiple H<sub>2</sub> occupancy of cages of clathrate hydrate under mild conditions. *Journal of the American Chemical Society*. 2012 Jun 6;134(22):9160-2.
7. Ma R, Zhong H, Liu J, Zhong J, Yan Y, Zhang J, Xu J. Molecular insights into cage occupancy of hydrogen hydrate: A computational study. *Processes*. 2019 Oct 3;7(10):699.
8. Mao WL, Mao HK. Hydrogen storage in molecular compounds. *Proceedings of the National Academy of Sciences*. 2004 Jan 20;101(3):708-10.
9. Papadimitriou NI, Tsimpanogiannis IN, Economou IG, Stubos AK. The effect of lattice constant on the storage capacity of hydrogen hydrates: A Monte Carlo study. *Molecular Physics*. 2016 Sep 16;114(18):2664-71.
10. Patchkovskii S, Tse JS. Thermodynamic stability of hydrogen clathrates. *Proceedings of the National Academy of Sciences*. 2003 Dec 9;100(25):14645-50.
11. Tachikawa H, Iyama T, Kawabata H. Maximum capacity of the hydrogen storage in water clusters. *Physics and Chemistry of Liquids*. 2009 Feb 1;47(1):103-9.
12. Willow SY, Xantheas SS. Enhancement of hydrogen storage capacity in hydrate lattices. *Chemical Physics Letters*. 2012 Feb 16;525:13-8.
13. Florusse LJ, Peters CJ, Schoonman J, Hester KC, Koh CA, Dec SF, Marsh KN, Sloan ED. Stable low-pressure hydrogen clusters stored in a binary clathrate hydrate. *Science*. 2004 Oct 15;306(5695):469-71.
14. Hashimoto S, Murayama S, Sugahara T, Sato H, Ohgaki K. Thermodynamic and Raman spectroscopic studies on H<sub>2</sub> + tetrahydrofuran + water and H<sub>2</sub> + tetra-n-butyl ammonium bromide + water mixtures containing gas hydrates. *Chemical Engineering Science*. 2006 Dec 1;61(24):7884-8.

15. Hester KC, Strobel TA, Sloan ED, Koh CA, Huq A, Schultz AJ. Molecular hydrogen occupancy in binary THF – H<sub>2</sub> clathrate hydrates by high resolution neutron diffraction. *The Journal of Physical Chemistry B*. 2006 Jul 27;110(29):14024-7.
16. Kang DW, Lee W, Ahn YH, Lee JW. Exploring tuning phenomena of THF – H<sub>2</sub> hydrates via molecular dynamics simulations. *Journal of Molecular Liquids*. 2022 Mar 1;349:118490.
17. Kaur SP, Ramachandran CN. Hydrogen-tetrahydrofuran mixed hydrates: A computational study. *International Journal of Hydrogen Energy*. 2018 Oct 18;43(42):19559-66.
18. Lee H, Lee JW, Kim DY, Park J, Seo YT, Zeng H, Moudrakovski IL, Ratcliffe CI, Ripmeester JA. Tuning clathrate hydrates for hydrogen storage. *Nature*. 2005 Apr 7;434(7034):743-6.
19. Liu J, Hou J, Xu J, Liu H, Chen G, Zhang J. Ab initio study of the molecular hydrogen occupancy in pure H<sub>2</sub> and binary H<sub>2</sub>-THF clathrate hydrates. *International Journal of Hydrogen Energy*. 2017 Jul 6;42(27):17136-43.
20. Park S, Koh DY, Kang H, Lee JW, Lee H. Effect of molecular nitrogen on multiple hydrogen occupancy in clathrate hydrates. *The Journal of Physical Chemistry C*. 2014 Sep 4;118(35):20203-8.
21. Nishikawa A, Tanabe T, Kitamura K, Matsumoto Y, Ohgaki K, Sugahara T. In situ Raman spectra of hydrogen in large cages of hydrogen+ tetrahydrofuran mixed hydrates. *Chemical Engineering Science*. 2013 Sep 20;101:1-4.
22. Strobel TA, Taylor CJ, Hester KC, Dec SF, Koh CA, Miller KT, Sloan ED. Molecular hydrogen storage in binary THF – H<sub>2</sub> clathrate hydrates. *The Journal of Physical Chemistry B*. 2006 Aug 31;110(34):17121-5.

23. Sugahara T, Haag JC, Prasad PS, Warntjes AA, Sloan ED, Sum AK, Koh CA. Increasing hydrogen storage capacity using tetrahydrofuran. *Journal of the American Chemical Society*. 2009 Oct 21;131(41):14616-7.
24. Sugahara T, Haag JC, Warntjes AA, Prasad PS, Sloan ED, Koh CA, Sum AK. Large-cage occupancies of hydrogen in binary clathrate hydrates dependent on pressures and guest concentrations. *The Journal of Physical Chemistry C*. 2010 Sep 9;114(35):15218-22.
25. Yedlapalli P, Lee S, Lee JW. Stable occupancy of hydrogen molecules in H<sub>2</sub> clathrate hydrates and H<sub>2</sub> + THF clathrate hydrates determined by ab initio calculations. *Journal of Thermodynamics*. 2010;2010(1):651819.
